# Supplementary material
Source: MDPI journal article supplement (https://www.mdpi.com/2073-4441/8/8/319)
Supplement: s1 [file s1]

## Sheet: Sheet1
	Inputs						Treatments													Outputs					Types of systems								Intensity
Authors	Supplying water	Stocking	Feeding	Fertilizing	Providing light	Reducing off-flavors	Controlling dissolved gas	Controlling the pH, hardness and alkalinity	Removing or controlling solids accumulation	Removing, transforming or controlling N compounds	Removing or controlling organic matter accumulation	Removing or controlling P compounds	Controlling temperature	Controlling metal concentrations	Vaccination	Medicine	Disinfection	Preventing diseases	Controlling disease outbreaks	Harvesting	Controlling GHG	Processing effluent water	Processing solid waste	Preventing escapes and other losses	Pond	Closed production units	Flow-through system	Recirculating aquaculture system (RAS)	Raceway system	Mixed/Integrated system	Marine/Cages or net pen	Partitioned aquaculture system (PAS)	Extensive	Semi-extensive	Semi-intensive	Intensive
Adhikari, Sahu, Mahapatra, & Dey, 2014			x	x						x	x	x										x	x		x
Ali et al., 2005			x							x	x	x										x														x
Asmala & Saikku, 2010			x							x		x										x	x								x
Avnimelech, 2006							x			x	x	x										x						x								x
Beitinger, Bennet, & McCauley, 2000													x
Bender & Phillips, 2004			x		x					x	x	x		x											x
Berg, Michélsen, Troell, Folke, & Kautsky, 1996			x				x																		x						x				x	x
Bergero et al., 2001										x												x							x							x
Bjørndal, Lane, & Weintraub, 2004		x	x																	x
Boeuf & Le Bail, 1999					x
Braaten & Flaherty, 2000	x																					x			x											x
Bulc, Istenic, & Klemencic, 2011	x																x	x				x			x			x
Bunting, 2007	x									x		x										x			x
Chan, 1993											x											x	x							x
Chen & Malone, 1994									x													x						x								x
Chen, Chang & Shieh, 2003	x						x	x		x	x											x
Colt, 2006							x		x	x				x														x								x
Colt, Watten, & Rust., 2009							x	x		x												x						x	x							x
Costa-Pierce, 1998			x		x		x			x		x										x			x					x
Crab, Avnimelech, Defoirdt, Bossier, & Verstraete, 2007			x							x	x											x						x								x
Cripps & Bergheim, 2000			x						x	x	x	x										x					x	x								x
Dasgupta, Pandey, Sarangi, & Mukhopadhyay, 2008	x		x	x																													x
Draganovic et al., 2013			x								x	x
Drapcho & Brune, 2000				x	x		x																									x
Eding, Kamstra, Verreth, Huisman, & Klapwijk, 2006									x	x	x											x						x								x
Farnworth & Petrell, 2005	x																								x
Forsberg, 1996		x																		x
Frier, From, Larsen, & Rasmussen, 1995									x	x	x	x										x	x
Funge-Smith & Briggs, 1998	x		x	x			x	x	x	x	x	x								x		x			x											x
Glouannec & Noel, 1999					x								x												x											x
Goetz & Janik, 2015																								x							x
Gomiero, Giampietro, Bukkens, & Paoletti, 1997			x	x																		x	x		x	x							x		x	x
Goudey, Loverich, Kite-Powell, & Costa-Pierce, 2001											x							x													x
Gross, Boyd, & Wood, 2000			x							x	x											x			x
Gutierrez-Wing & Malone, 2006	x									x	x											x						x								x
Gutiérrez-Estrada, de Pedro-Sanz, Lopez-Luque, & Pulido-Calvo, 2004										x																										x
Gutiérrez-Estrada, Pulido-Calvo, de la Rosa, & Marchini, 2012	x						x		x	x															x										x
Halachmi, 2013		x																		x											x
Hargreaves, Sheely, & To, 2000								x																	x
Hari, Madhusoodana Kurup, Varghese, Schrama, & Verdegem, 2006			x	x						x	x											x			x								x
Hu et al., 2013			x							x	x									x	x	x														x
Hu et al., 2014			x							x	x										x															x
Huysveld et al., 2013	x		x		x																				x
Islam, 2005			x							x	x	x										x	x								x				x	x
Islam, Sarker, Yamamoto, Wahab, & Tanaka, 2004			x	x	x					x	x	x						x				x			x										x
Iwama, 1991			x							x	x	x										x	x										x		x	x
Jamu & Piedrahita, 2001			x	x			x			x	x	x													x
Jamu & Piedrahita, 2002		x	x	x	x		x		x	x	x									x		x			x					x
Keppler & Martin, 2008	x								x	x		x										x				x
Kristensen, Åtland, Rosten, Urke, & Rosseland, 2009	x							x		x	x		x	x														x								x
Lamoureux, Tiersch, & Hall, 2006					x								x												x
Langford, Øxnevad, Schøyen, & Thomas, 2014																		x				x									x
Lekang, Bergheim, & Dalen, 2000					x				x																	x
Li, S., Willits, Browdy, Timmons, & Losordo, 2009					x								x																x	x
Li, W., & Li, Z., 2009							x			x	x	x										x			x					x
Liao, 1995													x												x
Liao, B.C. Chen, Lin, & J.W. Chen, 2000														x
Lima, Rivera, & Focken, 2012			x	x			x											x				x									x				x
Lin & Wu, 1996								x		x																										x
Liu, Xu, Wang, Wu, & Bao, 2014										x	x	x										x			x			x								x
Losordo & Hobbs, 2000	x		x				x		x	x												x						x								x
Malone & Pfeiffer, 2006			x							x	x											x						x
Mariscal-Lagarda & Páez-Osuna, 2014	x	x	x	x						x	x	x								x										x						x
Martins et al., 2010			x							x	x	x					x	x			x	x	x					x								x
Mook et al., 2012									x	x	x	x										x						x								x
Moore, 1986			x	x																													x	x	x	x
Morris, 1996																								x							x
Partridge, Sarre, Ginbey, Kay, & Jenkins, 2006			x				x		x	x		x				x			x	x					x										x
Read & Fernandes, 2003			x							x	x	x				x	x	x	x			x	x								x
Reid & Moccia, 2007												x																			x
Sanni & Forsberg, 1996							x	x														x					x									x
Seawright, Stickney, & Walker, 1998			x							x		x																x		x
Seginer & Halachmi, 2008		x																										x								x
Seginer, Mozes, & Lahav, 2008	x					x		x					x															x								x
Siikavuopio, Sæther, Skybakmoen, Uhlig, & Haugland, 2009					x
Singer, Parnes, Gross, Sagi, & Brenner, 2008										x	x											x						x								x
Steeby, Hargreaves, Tucker, & Kingsbury, 2004									x		x														x
Summerfelt, 2003																	x	x				x						x								x
Summerfelt, Davidson, Wilson, & Waldrop, 2009																				x						x										x
Summerfelt, Sharrer, Tsukuda, & Gearheart, 2009	x									x							x	x				x						x								x
Summerfelt, Vinci, & Piedrahita, 2000							x	x																				x								x
Tacon, Phillips, & Barg, 1995			x	x																															x	x
Thakur & Lin, 2003		x	x	x					x	x	x											x				x										x
Todd & Josephson, 1996					x					x		x		x								x	x							x						x
Tollner et al., 2004	x																								x
Tovar, Moreno, Manuel-Vez, & Garcia-Vargas, 2000a			x				x	x	x	x	x											x	x													x
Tovar, Moreno, Manuel-Vez, & Garcia-Vargas, 2000b			x				x		x	x	x											x	x		x											x
Trepanier, Parent, Comeau, & Bouvrette, 2002			x						x	x	x	x										x	x
True, Johnson, & Chen, 2004a			x						x		x	x										x	x				x		x
True, Johnson, & Chen, 2004b									x			x										x	x				x		x
True, Johnson, & Chen, 2004c									x			x										x	x				x		x
Twarowska, Westerman, & Losordo, 1997			x						x	x												x	x					x								x
Unger & Brinker, 2013			x						x													x	x					x								x
van Rijn, 1996			x						x	x	x											x	x						x							x
Wahab, Bergheim, & Braaten, 2003	x	x		x				x		x		x										x			x								x
Wang, Turton, Semmens, & Borisova, 2008	x	x	x				x			x										x									x	x						x
Ward et al., 2001			x															x	x												x
Webb et al., 2012			x	x	x					x	x											x														x
Werkman, Green, Murray, & Turnbull, 2011											x							x
Widmer, Carveth, Keffler, & Bonar, 2006	x												x	x														x								x
Wilfart, Prudhomme, Blancheton, & Aubin, 2013			x		x			x									x	x							x			x					x	x		x
Yang, 1998			x	x	x		x			x			x												x										x
Yi, 1999		x	x		x		x			x		x	x																	x
Yu & Leung, 2009																				x
Zhang & Fang, 2006			x						x			x										x			x
Ziegler et al., 2012																					x
